# Supplementary material for: Prognostic Value of Nucleated RBCs for Patients With Suspected Sepsis in the Emergency Department: A Single-Center Prospective Cohort Study
Source: PubMed Central journal article supplement — Crit Care Explor. 2021 Jul 16;3(7):e0490. doi: 10.1097/CCE.0000000000000490 (PMC8288902; doi:10.1097/cce.0000000000000490), 2021-07-16

## Supplementary table

**Supplemental Table 1:** Receiver operating characteristics (ROC) for clinical scores and selected laboratory tests in relation to 30-day mortality for patients with suspected sepsis.

|                             | AUC              | N    |
|-----------------------------|------------------|------|
| Charlson comorbidity index  | 0.65 (0.62-0.68) | 1227 |
| SOFA                        | 0.73 (0.71-0.76) | 1229 |
| qSOFA                       | 0.67 (0.65-0.70) | 1231 |
| NRBC                        | 0.60 (0.57-0.63) | 1231 |
| Platelets                   | 0.56 (0.53-0.59) | 1228 |
| Bilirubin                   | 0.54 (0.51-0.57) | 1226 |
| Glasgow coma scale          | 0.67 (0.64-0.69) | 1231 |
| Creatinine                  | 0.62 (0.59-0.65) | 1231 |
| Albumin                     | 0.66 (0.63-0.69) | 1226 |
| CRP                         | 0.55 (0.52-0.58) | 1231 |
| D-dimer                     | 0.66 (0.64-0.69) | 1133 |
| Lactate                     | 0.68 (0.65-0.70) | 1072 |
| Lactate dehydrogenase       | 0.68 (0.65-0.72) | 713  |
| Leukocytes                  | 0.54 (0.51-0.57) | 1231 |
| Lymphocytes                 | 0.50 (0.48-0.53) | 1194 |
| Neutrophils                 | 0.52 (0.50-0.52) | 1194 |
| Neutrophil/lymphocyte ratio | 0.50 (0.48-0.53) | 1194 |

AUC=Area under the curve, with 95 % confidence intervals.

## **Supplementary Figure legend**

**Supplemental Figure 1:** Relationship between NRBC score and other predictive variables for patients with suspected sepsis. Charlson score (A), SOFA score (B), Glasgow coma scale (GCS) (C) and laboratory results (D-J) grouped according to NRBC results. Red lines represent the median value.

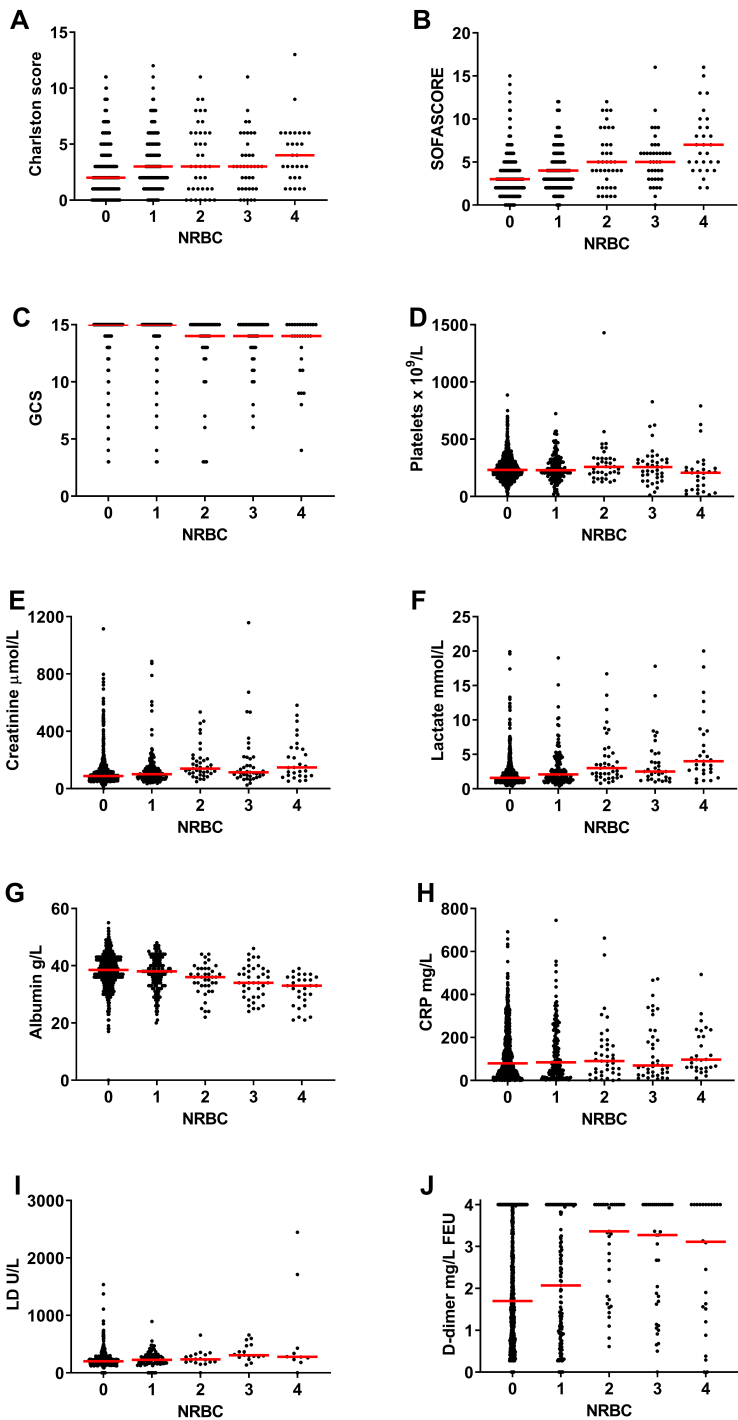

Supplement: cc9-3-e0490-s001.pdf [file cc9-3-e0490-s001.pdf]
